# Supplementary material for: Retro-Auricular Approach to the Fractures of the Mandibular Condyle: A Systematic Review
Source: PubMed Central journal article supplement (PMC7826936; doi:10.3390/jcm10020230), 2021-01-11
Supplement: jcm-10-00230-s001.pdf [file jcm-10-00230-s001.pdf]

**Table S1.** Details of the search strategies using PubMed, BASE and Google Scholar search engines.

| Search strategy |                                                                                                                                                                                                                                                                                                     |
|-----------------|-----------------------------------------------------------------------------------------------------------------------------------------------------------------------------------------------------------------------------------------------------------------------------------------------------|
| PubMed          | (mandible OR mandibular) AND (head OR neck OR collum OR condyle OR condylar) AND (fracture OR fractures) AND (retroauricular OR retro-auricular OR retroaural OR retro-aural OR postauricular OR post-auricular OR postaural OR post-aural OR transmeatal OR trans-meatal) AND (approach OR access) |
| BASE            | (mandible mandibular) AND (head neck collum condyle condylar) AND (fracture fractures) AND (retroauricular retro-auricular retroaural retro-aural postauricular post-auricular postaural post-aural transmeatal trans-meatal) AND (approach access)                                                 |
| Google Scholar  | allintitle: (mandible OR mandibular) (head OR neck OR collum OR condyle OR condylar) (retroauricular OR retro-auricular OR retroaural OR retro-aural OR postauricular OR post-auricular OR postaural OR post-aural OR transmeatal OR trans-meatal)                                                  |

**Table S2.** Records screened.

| Record (authors, title, date of publication)                                                                                                                                                                                                                              | Reason for exclusion (if applicable) |
|---------------------------------------------------------------------------------------------------------------------------------------------------------------------------------------------------------------------------------------------------------------------------|--------------------------------------|
| Kolk A, Neff A. Long-term results of ORIF of condylar head fractures of the mandible: A prospective 5-year follow-up study of small-fragment positional-screw osteosynthesis (SFPSO). 2015                                                                                | Included                             |
| Hoopes JE, Wolfort FG, Jabaley ME. Operative treatment of fractures of the mandibular condyle in children. Using the post-auricular approach. 1970                                                                                                                        | Wrong publication date               |
| Ivy RH. Post-auricular approach to mandibular condyle. 1970                                                                                                                                                                                                               | Wrong publication date               |
| Arcuri F, Brucoli M, Benech A. Analysis of the retroauricular transmeatal approach: a novel transfacial access to the mandibular skeleton. 2012                                                                                                                           | Included                             |
| Baek RM, Min KH, Heo CY, Eun SC. The perilobule approach to subcondylar fractures. 2011                                                                                                                                                                                   | Wrong intervention                   |
| Neff A, Mühlberger G, Karoglan M, et al. Stabilität der Osteosynthese bei Gelenkwalzenfrakturen in Klinik und biomechanischer Simulation. 2004                                                                                                                            | Wrong language                       |
| Benech A, Arcuri F, Baragiotta N, Nicolotti M, Brucoli M. Retroauricular transmeatal approach to manage mandibular condylar head fractures. 2011                                                                                                                          | Included                             |
| García-de Marcos JA. Minimal Incision Approach for Condyle Fracture Treatment. 2018                                                                                                                                                                                       | Wrong intervention                   |
| Al-Moraissi EA, Louvrier A, Colletti G, et al. Does the surgical approach for treating mandibular condylar fractures affect the rate of seventh cranial nerve injuries? A systematic review and meta-analysis based on a new classification for surgical approaches. 2018 | Wrong type of article                |

---

Duckwitz D. Unfall oder Gewaltdelikt? Retrospektive Analyse von  
Gesichtsverletzungen verursacht durch stumpfe Gewalt. 2014

Wrong language

---

Kim WS, Jittreetat T, Nam W, Sannikorn P, Choi EC, Koh YW.  
Reconstruction of the segmental mandibular defect using a  
retroauricular or modified face-lift incision with an intraoral  
approach in head and neck cancer. 2015

---

Wrong population
